# Supplementary material for: Factors that influence the uptake of postnatal care from the perspective of fathers, partners and other family members: a qualitative evidence synthesis
Source: HighWire-hosted journal article supplement (doi:10.1136/bmjgh-2022-011086), 2023-05-01
Supplement: bmjgh-2022-011086supp001_data_supplement.pdf [file bmjgh-2022-011086supp001_data_supplement.pdf]

**Appendix 2 - A priori framework**

| <b>THEMES</b>                   | <b>POTENTIAL EXAMPLES</b>                                                                                                                                                                                                                                                                                                                                                                                                                                                                                                                                                                                                                                                                                                   |
|---------------------------------|-----------------------------------------------------------------------------------------------------------------------------------------------------------------------------------------------------------------------------------------------------------------------------------------------------------------------------------------------------------------------------------------------------------------------------------------------------------------------------------------------------------------------------------------------------------------------------------------------------------------------------------------------------------------------------------------------------------------------------|
| <b>RESOURCES AND ACCESS</b>     | <ul style="list-style-type: none"> <li>• Resource Availability - Could be a facilitator as well as a lack/barrier? i.e maternal resources, to access care, or resources at a facility or available to a visiting professional care giver</li> <li>• Capacity to access health facility or healthcare provider? It could be quite close, but hard to get to, or a long way away, but easy to get to. In some systems, women don't go to health facility to access care, the healthcare provider comes to them</li> <li>• Place of postnatal care/delivery arrangements (including issues around integration of mother and baby care, and issues around the question of home visits)</li> <li>• Time/waiting times</li> </ul> |
| <b>BEHAVIORS AND ATTITUDES</b>  | <ul style="list-style-type: none"> <li>• (Lack of) Respectful care</li> <li>• (Lack of) trust in the system</li> <li>• Belief (or not) in the need for postnatal care?</li> <li>• Fear of stigma/test results/ policy/child services taking child away/knowing something is wrong with herself or the baby</li> <li>• Value or otherwise of the mother/baby to the family/society (including not seeking care because babies are "weak", not considered "important", money not well spent if used for newborn care, etc.)</li> </ul>                                                                                                                                                                                        |
| <b>EXTERNAL INFLUENCES</b>      | <ul style="list-style-type: none"> <li>• Influence of family/peers</li> <li>• Capacity for women to travel for care/Freedom of movement/quarantine</li> <li>• Influence of traditional/societal beliefs/superstitions (including social beliefs about postnatal care in modern and postmodern society that are not well grounded in evidence)</li> </ul>                                                                                                                                                                                                                                                                                                                                                                    |
| <b>WHAT WOMEN WANT AND NEED</b> | <ul style="list-style-type: none"> <li>• Continuity of care/carer</li> <li>• Need for information/advice (recognition of danger signs)</li> <li>• Optimising health of the baby (including thriving and feeding)</li> <li>• Optimising health of the mother (physical, psychological, emotional support)</li> </ul>                                                                                                                                                                                                                                                                                                                                                                                                         |

|  |                                                                                                                                                                                       |
|--|---------------------------------------------------------------------------------------------------------------------------------------------------------------------------------------|
|  | <ul style="list-style-type: none"><li>• Support for effective transition to motherhood (confidence, competence and adapting to changes in self and relationships to others)</li></ul> |
|--|---------------------------------------------------------------------------------------------------------------------------------------------------------------------------------------|
